# Supplementary material for: Reliability of COVID-19 symptom checkers as national triage tools: an international case comparison study
Source: PubMed Central journal article supplement — BMJ Health Care Inform. 2021 Oct 18;28(1):e100448. doi: 10.1136/bmjhci-2021-100448 (PMC8523957; doi:10.1136/bmjhci-2021-100448), 2021-10-18
Supplement: bmjhci-2021-100448supp001.pdf [file bmjhci-2021-100448supp001.pdf]

## Performance of national symptom checkers

## Supplementary file

Goyal et al., June 2021

|                | Triage Advice (Cough + Fever) |                    |           |           |                            |            | Relevant Diagnoses                                |
|----------------|-------------------------------|--------------------|-----------|-----------|----------------------------|------------|---------------------------------------------------|
|                | Singapore                     | USA                | England   | Scotland  | Wales                      | N. Ireland |                                                   |
| 12yrs (2 days) | PHCC                          | Stay Home          | 111 Nurse | Stay Home | Stay Home (unless worried) | Stay Home  | URTI, Mild COVID,                                 |
| 32yrs (2 days) | PHCC                          | Stay Home          | Stay Home | Stay Home | Stay Home                  | Stay Home  | URTI, Mild COVID,                                 |
| 52yrs (2 days) | PHCC                          | Stay Home          | Stay Home | Stay Home | Stay Home                  | Stay Home  | URTI, Mild COVID,                                 |
| 72yrs (2 days) | PHCC                          | Call provider asap | Stay Home | Stay Home | Call 111                   | Stay Home  | URTI, Mild COVID, Bacterial Pneumonia             |
| 12yrs (4 days) | PHCC                          | Stay Home          | 111 Nurse | Stay Home | Stay Home (unless worried) | Stay Home  | Mild COVID, Moderate COVID, Bacterial Pneumonia   |
| 32yrs (4 days) | PHCC                          | Stay Home          | Stay Home | Stay Home | Stay Home                  | Stay Home  | Mild COVID, Moderate COVID, Bacterial Pneumonia   |
| 52yrs (4 days) | PHCC or GP                    | Stay Home          | Stay Home | Stay Home | Stay Home                  | Stay Home  | Mild COVID, Moderate COVID, Bacterial Pneumonia   |
| 72yrs (4 days) | PHCC or GP                    | Call provider asap | Stay Home | Stay Home | Call 111                   | Stay Home  | Mild COVID, Moderate COVID, Bacterial Pneumonia   |
| 12yrs (7 days) | PHCC or GP                    | Stay Home          | 111 Nurse | Stay Home | Contact GP < 6hrs/111      | Stay Home  | Moderate COVID, Severe COVID, Bacterial Pneumonia |
| 32yrs (7 days) | PHCC or GP                    | Stay Home          | Stay Home | Stay Home | Stay Home                  | Stay Home  | Moderate COVID, Severe COVID, Bacterial Pneumonia |

## Performance of national symptom checkers

## Supplementary file

|                 | Triage Advice (Cough + Fever) |                    |           |           |                       |            | Relevant Diagnoses                                |
|-----------------|-------------------------------|--------------------|-----------|-----------|-----------------------|------------|---------------------------------------------------|
|                 | Singapore                     | USA                | England   | Scotland  | Wales                 | N. Ireland |                                                   |
| 52yrs (7 days)  | PHCC or GP                    | Stay Home          | Stay Home | Stay Home | Stay Home             | Stay Home  | Moderate COVID, Severe COVID, Bacterial Pneumonia |
| 72yrs (7 days)  | PHCC or GP                    | Call provider asap | Stay Home | Stay Home | Call 111              | Stay Home  | Moderate COVID, Severe COVID, Bacterial Pneumonia |
| 12yrs (10 days) | PHCC or GP                    | Stay Home          | 111 Nurse | Stay Home | Contact GP < 6hrs/111 | Stay Home  | Moderate COVID, Severe COVID, Bacterial Pneumonia |
|                 | PHCC or GP                    | Stay Home          | Stay Home | Stay Home | Stay Home             | Stay Home  | Moderate COVID, Severe COVID, Bacterial Pneumonia |
|                 | PHCC or GP                    | Stay Home          | Stay Home | Stay Home | Stay Home             | Stay Home  | Moderate COVID, Severe COVID, Bacterial Pneumonia |
| 72yrs (10 days) | PHCC or GP                    | Call provider asap | Stay Home | Stay Home | Call 111              | Stay Home  | Moderate COVID, Severe COVID, Bacterial Pneumonia |

Table 1. Scenario 1.

Triage Advice (Co-morbidity + Cough + Fever)

## Performance of national symptom checkers

## Supplementary file

|                | Singapore  | Japan          | USA                | England   | Scotland     | Wales                 | N Ireland |  |
|----------------|------------|----------------|--------------------|-----------|--------------|-----------------------|-----------|--|
| 12yrs (2 days) | PHCC or GP | Stay Home      | Call provider asap | Call 111  | 111 Urgently | Contact GP < 6hrs/111 | Stay Home |  |
| 32yrs (2 days) | PHCC or GP | Stay Home      | Call provider asap | Stay Home | Stay Home    | Stay Home             | Stay Home |  |
| 52yrs (2 days) | PHCC or GP | Stay Home      | Call provider asap | Stay Home | Stay Home    | Stay Home             | Stay Home |  |
| 72yrs (2 days) | PHCC or GP | Stay Home      | Call provider asap | Stay Home | Stay Home    | Call 111              | Stay Home |  |
| 12yrs (4 days) | PHCC or GP | GP             | Call provider asap | Call 111  | 111 Urgently | GP < 6hours/111       | Stay Home |  |
| 32yrs (4 days) | PHCC or GP | GP             | Call provider asap | Stay Home | Stay Home    | Stay Home             | Stay Home |  |
| 52yrs (4 days) | PHCC or GP | GP             | Call provider asap | Stay Home | Stay Home    | Stay Home             | Stay Home |  |
| 72yrs (4 days) | PHCC or GP | GP             | Call provider asap | Stay Home | Stay Home    | Call 111              | Stay Home |  |
| 12yrs (7 days) | PHCC or GP | Medical Centre | Call provider asap | Call 111  | 111 Urgently | GP < 6hours/111       | Stay Home |  |
| 32yrs (7 days) | PHCC or GP | Medical Centre | Call provider asap | Stay Home | Stay Home    | Stay Home             | Stay Home |  |
| 52yrs (7 days) | PHCC or GP | Medical Centre | Call provider asap | Stay Home | Stay Home    | Stay Home             | Stay Home |  |
| 72yrs (7 days) | PHCC or GP | Medical Centre | Call provider asap | Stay Home | Stay Home    | Call 111              | Stay Home |  |

Table 2: Scenario 2

| Triage Advice (Cough + Fever + Immunosuppression) |       |     |         |          |       |           |  | Relevant Diagnoses |
|---------------------------------------------------|-------|-----|---------|----------|-------|-----------|--|--------------------|
| Singapore                                         | Japan | USA | England | Scotland | Wales | N Ireland |  |                    |
|                                                   |       |     |         |          |       |           |  |                    |

## Performance of national symptom checkers

## Supplementary file

|                    | Triage Advice (Cough + Fever + Immunosuppression) |                |                            |                             |              |          |           | Relevant Diagnoses              |
|--------------------|---------------------------------------------------|----------------|----------------------------|-----------------------------|--------------|----------|-----------|---------------------------------|
|                    | Singapore                                         | Japan          | USA                        | England                     | Scotland     | Wales    | N Ireland |                                 |
| 12yrs old (2 days) | PHCC or GP                                        | Stay Home      | Call medical provider asap | Call 111 & Speak to a Nurse | 111 Urgently | Call 111 | GP        | URTI, COVID, Neutropenic Sepsis |
| 32yrs old (2 days) | PHCC or GP                                        | Stay Home      | Call medical provider asap | Call 111 & Speak to a Nurse | 111 Urgently | Call 111 | GP        | URTI, COVID, Neutropenic Sepsis |
| 52yrs old (2 days) | PHCC or GP                                        | Stay Home      | Call medical provider asap | Call 111 & Speak to a Nurse | 111 Urgently | Call 111 | GP        | URTI, COVID, Neutropenic Sepsis |
| 72yrs old (2 days) | PHCC or GP                                        | Stay Home      | Call medical provider asap | Call 111 & Speak to a Nurse | 111 Urgently | Call 111 | GP        | URTI, COVID, Neutropenic Sepsis |
| 12yrs old (4 days) | PHCC or GP                                        | Medical Centre | Call medical provider asap | Call 111 & Speak to a Nurse | 111 Urgently | Call 111 | GP        | URTI, COVID, Neutropenic Sepsis |
| 32yrs old (4 days) | PHCC or GP                                        | Medical Centre | Call medical provider asap | Call 111 & Speak to a Nurse | 111 Urgently | Call 111 | GP        | URTI, COVID, Neutropenic Sepsis |
| 52yrs old (4 days) | PHCC or GP                                        | Medical Centre | Call medical provider asap | Call 111 & Speak to a Nurse | 111 Urgently | Call 111 | GP (now)  | URTI, COVID, Neutropenic Sepsis |
| 72yrs old (4 days) | PHCC or GP                                        | Medical Centre | Call medical provider asap | Call 111 & Speak to a Nurse | 111 Urgently | Call 111 | GP        | URTI, COVID, Neutropenic Sepsis |
| 12yrs old (7 days) | PHCC or GP                                        | Medical Centre | Call medical provider asap | Call 111 & Speak to a Nurse | 111 Urgently | Call 111 | GP        | URTI, COVID, Neutropenic Sepsis |

## Performance of national symptom checkers

## Supplementary file

|                    | Triage Advice (Cough + Fever + Immunosuppression) |                |                            |                             |              |          |           | Relevant Diagnoses              |
|--------------------|---------------------------------------------------|----------------|----------------------------|-----------------------------|--------------|----------|-----------|---------------------------------|
|                    | Singapore                                         | Japan          | USA                        | England                     | Scotland     | Wales    | N Ireland |                                 |
| 32yrs old (7 days) | PHCC or GP                                        | Medical Centre | Call medical provider asap | Call 111 & Speak to a Nurse | 111 Urgently | Call 111 | GP        | URTI, COVID, Neutropenic Sepsis |
| 52yrs old (7 days) | PHCC or GP                                        | Medical Centre | Call medical provider asap | Call 111 & Speak to a Nurse | 111 Urgently | Call 111 | GP        | URTI, COVID, Neutropenic Sepsis |
| 72yrs old (7 days) | PHCC or GP                                        | Medical Centre | Call medical provider asap | Call 111 & Speak to a Nurse | 111 Urgently | Call 111 | GP        | URTI, COVID, Neutropenic Sepsis |

Table 3: Scenario 3

|                     | Triage Advice (Shortness of Breath + Fever for 5 days) |                |           |          |              |                  |           | Relevant Diagnoses                                     |
|---------------------|--------------------------------------------------------|----------------|-----------|----------|--------------|------------------|-----------|--------------------------------------------------------|
|                     | Singapore                                              | Japan          | USA       | England  | Scotland     | Wales            | N Ireland |                                                        |
| 12yr old (mild)     | ED                                                     | Medical Centre | Stay Home | Call 111 | 111 Urgently | GP < 6hours/ 111 | GP Now    | Severe COVID, Sepsis, Bacterial Pneumonia              |
| 32yr old (mild)     | ED                                                     | Medical Centre | Stay Home | Call 111 | 111 Urgently | Stay Home        | GP Now    | Severe COVID, Sepsis, Bacterial Pneumonia              |
| 52yr old (mild)     | ED                                                     | Medical Centre | Stay Home | Call 111 | 111 Urgently | Stay Home        | GP Now    | Severe COVID, Sepsis, Bacterial Pneumonia              |
| 72yr old (mild)     | ED                                                     | Medical Centre | Stay Home | Call 111 | 111 Urgently | Call 111         | GP Now    | Severe COVID, Sepsis, Bacterial Pneumonia              |
| 12yr old (moderate) | ED                                                     | Medical Centre | Stay Home | Call 111 | 111 Urgently | GP < 6hours/ 111 | GP Now    | Severe COVID, Sepsis, Septic Shock Bacterial Pneumonia |

## Performance of national symptom checkers

## Supplementary file

|                     | Triage Advice (Shortness of Breath + Fever for 5 days) |                |           |          | Scotland     | Wales     | N Ireland | Relevant Diagnoses                                        |
|---------------------|--------------------------------------------------------|----------------|-----------|----------|--------------|-----------|-----------|-----------------------------------------------------------|
|                     | Singapore                                              | Japan          | USA       | England  |              |           |           |                                                           |
| 32yr old (moderate) | ED                                                     | Medical Centre | Stay Home | Call 111 | 111 Urgently | Stay Home | GP Now    | Severe COVID, Sepsis, Septic Shock<br>Bacterial Pneumonia |
| 52yr old (moderate) | ED                                                     | Medical Centre | Stay Home | Call 111 | 111 Urgently | Stay Home | GP Now    | Severe COVID, Sepsis, Septic Shock<br>Bacterial Pneumonia |
| 72yr old (moderate) | ED                                                     | Medical Centre | ED        | Call 111 | 111 Urgently | Call 111  | GP Now    | Severe COVID, Sepsis, Septic Shock<br>Bacterial Pneumonia |
| 12yr old (severe)   | ED                                                     | Medical Centre | ED        | ED       | 111 Urgently | 999       | 999       | Critical COVID,<br>Bacterial Pneumonia                    |
| 32yr old (severe)   | ED                                                     | Medical Centre | ED        | ED       | 111 Urgently | 999       | 999       | Critical COVID,<br>Bacterial Pneumonia                    |
| 52yr old (severe)   | ED                                                     | Medical Centre | ED        | ED       | 111 Urgently | 999       | 999       | Critical COVID,<br>Bacterial Pneumonia                    |
| 72yr old (severe)   | ED                                                     | Medical Centre | ED        | ED       | 111 Urgently | 999       | 999       | Critical COVID,<br>Bacterial Pneumonia                    |

Table 4: Scenario 4

Performance of national symptom checkers

Supplementary file

Performance of national symptom checkers

Supplementary file
